# Supplementary material for: Thermal behaviors during lithium diffusion in Li0.4WO3 bronze studied by elastic and quasi-elastic neutron scattering
Source: Royal Society of Chemistry journal article supplement (doi:10.1039/d4cp00752b), 2024-01-01
Supplement: d4cp00752b1.pdf [file d4cp00752b1.pdf]

## Supplementary Information

### Thermal behaviors during lithium diffusion in $\text{Li}_{0.4}\text{WO}_3$ bronze studied by elastic and quasi-elastic neutron scattering

M. Mangir Murshed<sup>1,4\*</sup>, Michael Fischer<sup>2,4</sup>, Michael M. Koza<sup>3</sup>, Th. M. Gesing<sup>1,4</sup>

<sup>1</sup>University of Bremen, Institute of Inorganic Chemistry and Crystallography, Leobener Straße 7, D-28359 Bremen, Germany

<sup>2</sup>University of Bremen, Crystallography, Faculty of Geosciences, Klagenfurter Straße 2-4, D-28359 Bremen, Germany

<sup>3</sup>Institut Laue Langevin, 38042 GRENOBLE Cedex 9, France

<sup>4</sup>University of Bremen, MAPEX Center for Materials and Processes, Bibliothekstraße 1, D-28359 Bremen, Germany

\*Corresponding author Tel.: +49 (0)421 218 63144, E-mail: [murshed@uni-bremen.de](mailto:murshed@uni-bremen.de)

ORCID:

MMM: 0000-0002-9063-372X

MF: 0000-0001-5133-1537

MMK: 0000-0002-5133-8584

TMG: 0000-0002-4119-2219

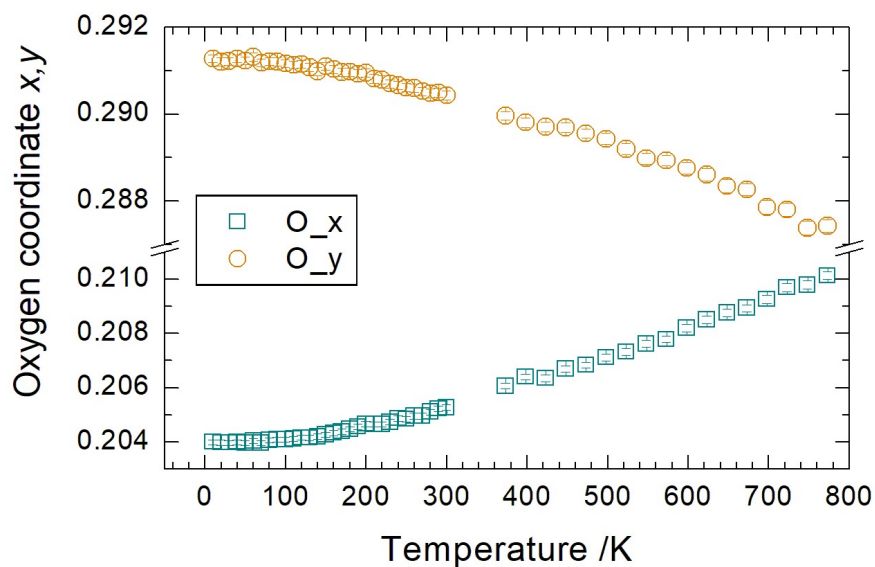

**Figure S1:** Changes of  $x$ - and  $y$ -coordinate of oxygen in  $\text{Li}_{0.4}\text{WO}_3$  bronze **with respect to** temperature.

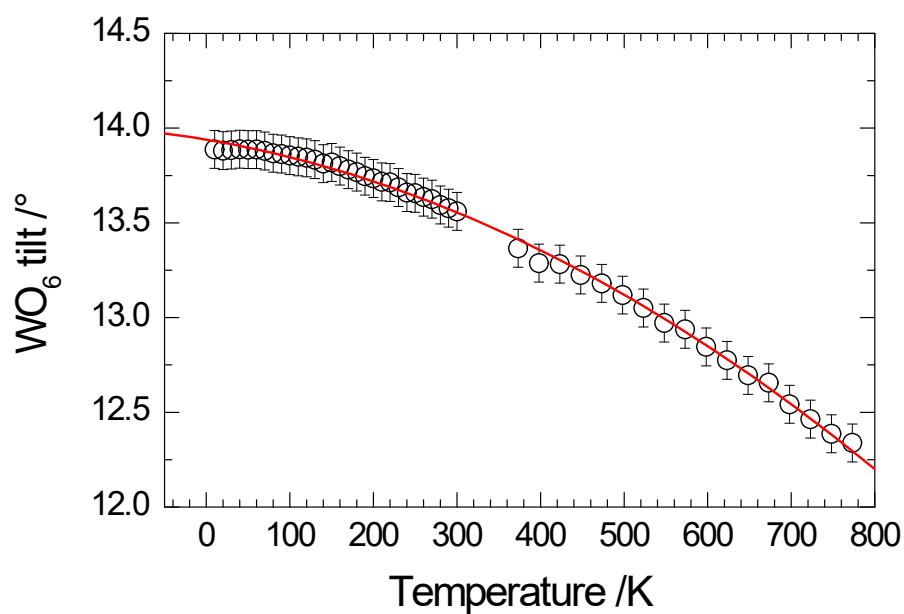

**Figure S2:** Temperature-dependent tilting of the  $\text{WO}_6$  octahedra in  $\text{Li}_{0.4}\text{WO}_3$  bronze.

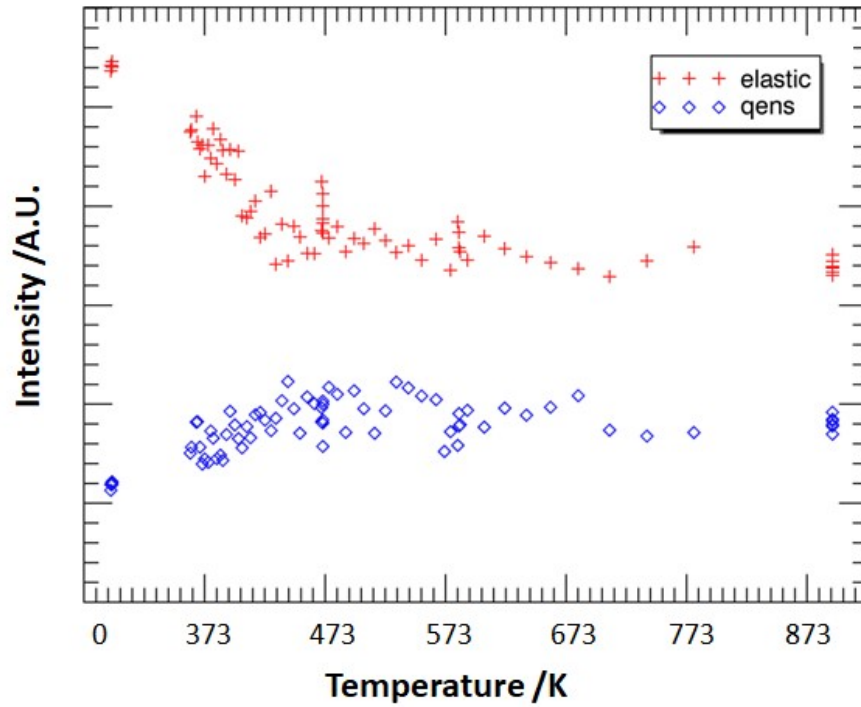

**Figure S3:** Temperature-dependent neutron elastic and inelastic integrated intensity over low  $Q$ -range. The rapid drop of the elastic intensity above 295 K is due to the onset of lithium diffusion, leading to redistribution of the scattering intensity from the elastic into the quasielastic scattering.

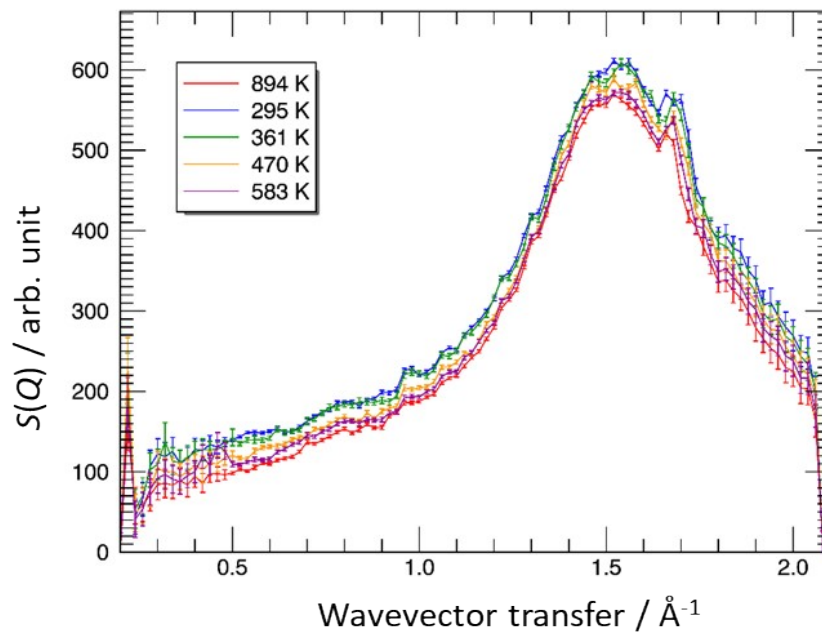

**Figure S4:**  $S(Q)$  summed over all accessible energy of  $S(Q,E)$ , showing temperature-dependent Bragg peak intensity.

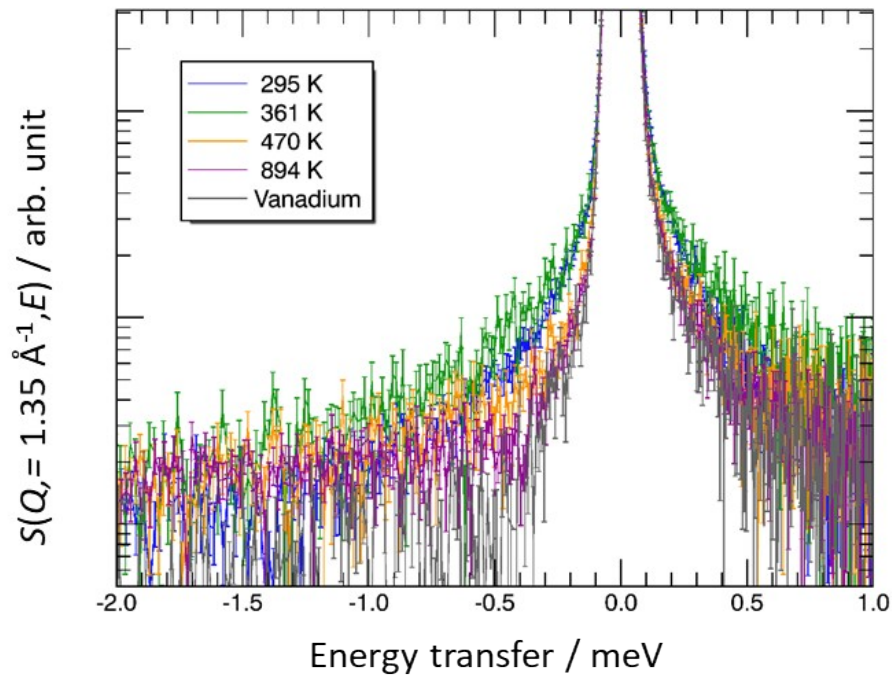

**Figure S5:** Temperature-dependent  $S(Q,E)$  at  $1.35 \text{ \AA}^{-1}$ , showing Lorentzian broadening.

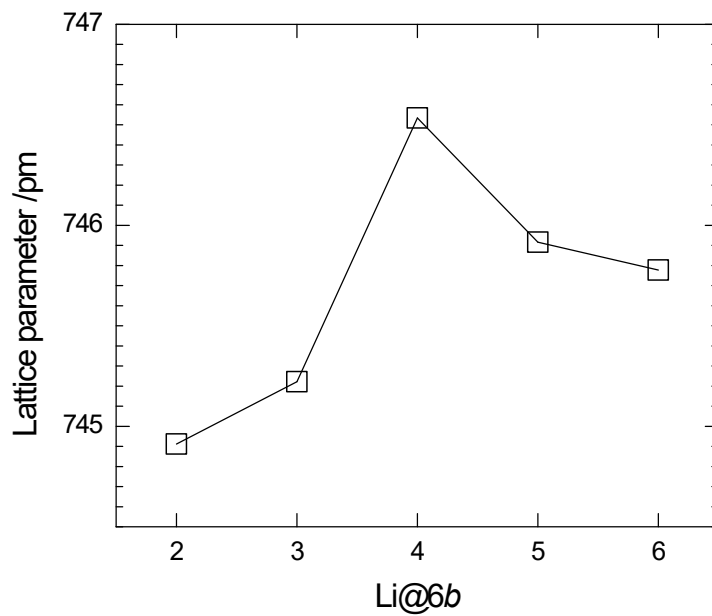

**Figure S6:** DFT calculated lattice parameter as function of lithium content only at the  $6b$  site of  $\text{Li}_x\text{O}_8\text{O}_{24}$ .

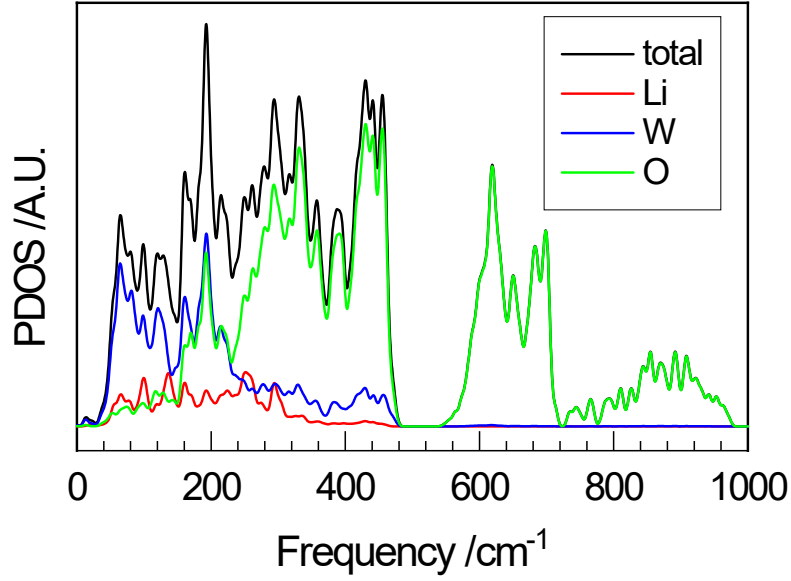

**Figure S7:** DFT calculated phonon density of states (PDOS) of  $\text{Li}_3\text{W}_8\text{O}_{24}$ , where all there lithium atoms are located only at  $6b$  of the space group  $Pm-3$ .

**Table S1:** DFT calculated total energy (E) along with the lattice parameter for the distribution of lithium at two crystallographic sites for different unit cell compositions of  $\text{Li}_x\text{W}_8\text{O}_{24}$ .  $\Delta E$  refers to energy difference with respect to the lowest-energy model for a given composition.

| Composition                          | Li @6b | Li@2a | Symmetry    | E/ eV            | $\Delta E/ \text{kJ mol}^{-1}$ | $a / \text{pm}$ |
|--------------------------------------|--------|-------|-------------|------------------|--------------------------------|-----------------|
| $\text{Li}_2\text{W}_8\text{O}_{24}$ | 2      | 0     | <i>Immm</i> | <b>-84997.36</b> | 5.54                           | 745.82          |
|                                      | 2      | 0     | <i>Pmmm</i> | <b>-84997.42</b> | 0.00                           | 744.91          |
|                                      | 2      | 0     | <i>Pmmm</i> | <b>-84997.41</b> | 0.93                           | 744.86          |
|                                      | 1      | 1     | <i>Pmmm</i> | <b>-84997.38</b> | 3.35                           | 749.53          |
|                                      | 1      | 1     | <i>Pmmm</i> | <b>-84997.40</b> | 2.11                           | 749.10          |
|                                      | 0      | 2     | <i>Im-3</i> | <b>-84996.74</b> | 65.64                          | 763.56          |
| $\text{Li}_3\text{W}_8\text{O}_{24}$ | 3      | 0     | <i>Pm-3</i> | <b>-85201.15</b> | 3.30                           | 745.11          |
|                                      | 3      | 0     | <i>Pmmm</i> | <b>-85201.11</b> | 7.00                           | 745.42          |
|                                      | 3      | 0     | <i>Pmmm</i> | <b>-85201.18</b> | 0.00                           | 745.22          |
|                                      | 3      | 0     | <i>Pmmm</i> | <b>-85201.12</b> | 6.25                           | 745.46          |
|                                      | 2      | 1     | <i>Pmmm</i> | <b>-85200.62</b> | 54.31                          | 746.68          |
|                                      | 2      | 1     | <i>Pmmm</i> | <b>-85200.73</b> | 43.62                          | 746.46          |
|                                      | 2      | 1     | <i>Pmmm</i> | <b>-85201.11</b> | 7.42                           | 746.86          |
|                                      | 2      | 1     | <i>Pmmm</i> | <b>-85200.69</b> | 48.07                          | 746.55          |
|                                      | 2      | 1     | <i>Pmmm</i> | <b>-85200.68</b> | 48.14                          | 747.46          |
|                                      | 1      | 2     | <i>Pmmm</i> | <b>-85201.04</b> | 14.08                          | 751.98          |

|                                                |   |   |             |                  |       |        |
|------------------------------------------------|---|---|-------------|------------------|-------|--------|
| Li <sub>4</sub> W <sub>8</sub> O <sub>24</sub> | 4 | 0 | <i>Immm</i> | <b>-85404.03</b> | 7.17  | 746.75 |
|                                                | 4 | 0 | <i>Pmmm</i> | <b>-85404.10</b> | 0.00  | 746.53 |
|                                                | 4 | 0 | <i>Pmmm</i> | <b>-85404.08</b> | 1.83  | 746.01 |
|                                                | 3 | 1 | <i>Pm-3</i> | <b>-85403.52</b> | 56.07 | 747.20 |
|                                                | 3 | 1 | <i>Pm-3</i> | <b>-85403.70</b> | 39.28 | 747.29 |
|                                                | 3 | 1 | <i>Pmmm</i> | <b>-85403.58</b> | 50.91 | 747.43 |
|                                                | 3 | 1 | <i>Pmmm</i> | <b>-85403.61</b> | 47.09 | 747.64 |
|                                                | 3 | 1 | <i>Pmmm</i> | <b>-85403.54</b> | 54.10 | 747.45 |
|                                                | 3 | 1 | <i>Pmmm</i> | <b>-85403.61</b> | 47.55 | 747.46 |
|                                                | 3 | 1 | <i>Pmmm</i> | <b>-85403.61</b> | 47.85 | 747.15 |
|                                                | 3 | 1 | <i>Pmmm</i> | <b>-85403.66</b> | 42.42 | 747.21 |
|                                                | 2 | 2 | <i>Immm</i> | <b>-85404.01</b> | 9.35  | 748.66 |
|                                                | 2 | 2 | <i>Pmmm</i> | <b>-85404.03</b> | 6.68  | 749.56 |
|                                                | 2 | 2 | <i>Pmmm</i> | <b>-85404.07</b> | 2.72  | 748.64 |
| Li <sub>5</sub> W <sub>8</sub> O <sub>24</sub> | 5 | 0 | <i>Pmmm</i> | <b>-85606.94</b> | 0.00  | 745.92 |
|                                                | 3 | 2 | <i>Pm-3</i> | <b>-85605.98</b> | 92.30 | 749.32 |
|                                                | 3 | 2 | <i>Pmmm</i> | <b>-85606.89</b> | 5.12  | 749.55 |
|                                                | 3 | 2 | <i>Pmmm</i> | <b>-85605.94</b> | 96.37 | 749.53 |
|                                                | 3 | 2 | <i>Pmmm</i> | <b>-85605.99</b> | 91.22 | 749.22 |
| Li <sub>6</sub> W <sub>8</sub> O <sub>24</sub> | 6 | 0 | <i>Im-3</i> | <b>-85809.72</b> | 0.00  | 745.78 |
|                                                | 4 | 2 | <i>Immm</i> | <b>-85809.64</b> | 7.52  | 750.67 |
|                                                | 4 | 2 | <i>Pmmm</i> | <b>-85808.73</b> | 95.91 | 749.43 |
|                                                | 4 | 2 | <i>Pmmm</i> | <b>-85808.74</b> | 94.77 | 749.63 |
| Li <sub>7</sub> W <sub>8</sub> O <sub>24</sub> | 6 | 1 | <i>Pm-3</i> | <b>-86011.90</b> | 0.00  | 747.63 |
|                                                | 5 | 2 | <i>Pmmm</i> | <b>-86011.40</b> | 48.04 | 749.68 |
| Li <sub>8</sub> W <sub>8</sub> O <sub>24</sub> | 6 | 2 | <i>Im-3</i> | <b>-86214.08</b> | 0     | 749.39 |
